# Supplementary material
Source: Research Square preprint supplement (doi:10.21203/rs.3.rs-8203981/v1)
Supplement: Supplementary file 1 [file 3c27b7b41dc83519ddcc19b8.pdf]

# Exploiting Granger Causality for Dynamic Multimodal Emotion Recognition in Video Learning Context

## Table

**Table 1** Comparative Results with Other Models

| Method                    | Model           | Accuracy(%) | Recall(%) | F1-score |
|---------------------------|-----------------|-------------|-----------|----------|
| Feature Extraction Method | LSTM [1]        | 67.59       | 67.89     | 0.67     |
|                           | CNN-LSTM [2]    | 73.23       | 73.14     | 0.73     |
|                           | Transformer [3] | 79.52       | 80.03     | 0.79     |
| Static Fusion Method      | CMHA [4]        | 83.97       | 84.01     | 0.84     |
|                           | CLA-TCN [5]     | 81.52       | 81.03     | 0.81     |
|                           | PCAF [6]        | 86.69       | 86.62     | 0.86     |
| <b>Ours</b>               |                 | 96.79       | 96.80     | 0.97     |

**Table 2** Comparative Results with Other Models

| Setting                                | Accuracy(%) | Recall(%) | F1-score |      |
|----------------------------------------|-------------|-----------|----------|------|
| $(f_e f_p, f_p f_e, f_i f_v, f_v f_i)$ | 93.26       | 93.53     | 0.93     |      |
| $(f_e f_i, f_i f_e, f_p f_v, f_v f_p)$ | 94.68       | 94.42     | 0.95     |      |
| <b>Ours</b>                            |             | 96.79     | 96.80    | 0.97 |

**Table 3** Verification of the Effectiveness of Granger Causality and Dynamic Multimodal Attention Fusion

| Exp. | P | V | G | D | C | Accuracy(%) | Recall(%) | F1 Score | Params(MB) |
|------|---|---|---|---|---|-------------|-----------|----------|------------|
| 1    | ✓ | - | - | - | - | 63.57       | 63.54     | 0.64     | 0.467      |
| 2    | - | ✓ | - | - | - | 77.03       | 76.96     | 0.77     | 0.450      |
| 3    | ✓ | ✓ | - | - | - | 80.39       | 80.27     | 0.80     | 0.79       |
| 4    | ✓ | ✓ | ✓ | - | - | 88.82       | 88.80     | 0.89     | 1.675      |
| 5    | ✓ | ✓ | ✓ | - | ✓ | 95.44       | 95.45     | 0.95     | 10.726     |
| 6    | ✓ | ✓ | ✓ | ✓ | - | 96.79       | 96.80     | 0.97     | 4.646      |

**Table 4** Comparison with other models on HCI dataset

| Method          | Accuracy(%) |         | F1-score |         |
|-----------------|-------------|---------|----------|---------|
|                 | Arousal     | Valence | Arousal  | Valence |
| LSTM [1]        | 66.21       | 67.90   | 0.66     | 0.67    |
| CNN-LSTM [2]    | 70.92       | 71.90   | 0.69     | 0.70    |
| Transformer [3] | 79.83       | 80.18   | 0.78     | 0.79    |
| CMHA [4]        | 80.44       | 81.46   | 0.79     | 0.80    |
| CLA-TCN [5]     | 79.17       | 79.78   | 0.78     | 0.78    |
| PCAF [6]        | 85.34       | 86.62   | 0.84     | 0.85    |
| <b>Ours</b>     | 93.73       | 94.35   | 0.91     | 0.93    |

## References

- [1] Alhagry S, Fahmy AA, El-Khoribi RA. Emotion recognition based on EEG using LSTM recurrent neural network. *International Journal of Advanced Computer Science and Applications*. 2017;8(10).
- [2] Chakravarthi B, Ng SC, Ezilarasan M, Leung MF. EEG-based emotion recognition using hybrid CNN and LSTM classification. *Frontiers in Computational Neuroscience*. 2022;16:1019776.
- [3] Vaswani A, Shazeer N, Parmar N, Uszkoreit J, Jones L, Gomez AN, et al. Attention Is All You Need. *arXiv*. 2017;.
- [4] Zheng J, Zhang S, Wang Z, Wang X, Zeng Z. Multi-channel weight-sharing autoencoder based on cascade multi-head attention for multimodal emotion recognition. *IEEE Transactions on Multimedia*. 2022;25:2213–2225.
- [5] Ye H, Zhou Y, Tao X. A Method of Multimodal Emotion Recognition in Video Learning Based on Knowledge Enhancement. *Computer Systems Science & Engineering*. 2023;47(2).
- [6] Zhang Y, Tao X, Ai H, Chen T, Gan Y. Multimodal Emotion Recognition by Fusing Video Semantic in MOOC Learning Scenarios. *arXiv preprint arXiv:240407484*. 2024;.
